# Supplementary material
Source: publisher site journal article supplement (https://www.dovepress.com/article/481947)
Supplement: Supplementary file 1 [file get_supplementary_file.php]

**Supplementary Material S1**

Search queries

**A.PubMed**

#1 Acupuncture [Mesh]

#2 Acupuncture [Title/Abstract] OR acupuncture therapy[Title/Abstract] OR body acupuncture [Title/Abstract] OR manual acupuncture [Title/Abstract] OR electroacupuncture [Title/Abstract] OR electro-acupuncture [Title/Abstract]

#3 #1 OR #2

#4 Delphi [Mesh]

#5 Delphi technique [Title/Abstract] OR technique, Delphi [Title/Abstract] OR techniques, Delphi [Title/Abstract] OR Delphi technic [Title/Abstract] OR Delphi technics [Title/Abstract] OR technic, Delphi [Title/Abstract] OR technics, Delphi [Title/Abstract] OR Delphi studies [Title/Abstract] OR Delphi study [Title/Abstract] OR studies, Delphi [Title/Abstract] OR study, Delphi [Title/Abstract]

#6 #4 OR #5

#7 #3 AND #6

**B.Embase**

('acupuncture'/exp OR acupuncture OR 'acupuncture therapy'/exp OR 'acupuncture therapy' OR (('acupuncture'/exp OR acupuncture) AND ('therapy'/exp OR therapy)) OR 'body acupuncture'/exp OR 'body acupuncture' OR (('body'/exp OR body) AND ('acupuncture'/exp OR acupuncture)) OR 'manual acupuncture'/exp OR 'manual acupuncture' OR (('manual'/exp OR manual) AND ('acupuncture'/exp OR acupuncture)) OR 'electroacupuncture'/exp OR electroacupuncture OR 'electro acupuncture'/exp OR 'electro acupuncture') AND ('delphi'/exp OR delphi OR 'delphi technique'/exp OR 'delphi technique' OR (('delphi'/exp OR delphi) AND ('technique'/exp OR technique)) OR 'technique, delphi'/exp OR 'technique, delphi' OR (('technique,'/exp OR technique,) AND ('delphi'/exp OR delphi)) OR 'techniques, delphi' OR (techniques, AND ('delphi'/exp OR delphi)) OR 'delphi technic' OR (('delphi'/exp OR delphi) AND technic) OR 'delphi technics' OR (('delphi'/exp OR delphi) AND technics) OR 'technic, delphi' OR (technic, AND ('delphi'/exp OR delphi)) OR 'technics, delphi' OR (technics, AND ('delphi'/exp OR delphi)) OR 'delphi studies'/exp OR 'delphi studies' OR (('delphi'/exp OR delphi) AND ('studies'/exp OR studies)) OR 'delphi study'/exp OR 'delphi study' OR (('delphi'/exp OR delphi) AND ('study'/exp OR study)) OR 'studies, delphi' OR (studies, AND ('delphi'/exp OR delphi)) OR 'study, delphi' OR (('study,'/exp OR study,) AND ('delphi'/exp OR delphi)))

**C.Cochrane Library**

(Acupuncture OR acupuncture therapy OR body acupuncture OR manual acupuncture OR electroacupuncture OR electro-acupuncture) AND (Delphi OR Delphi technique OR technique, Delphi OR techniques, Delphi OR Delphi technic OR Delphi technics OR technic, Delphi OR technics, Delphi OR Delphi studies OR Delphi study OR studies, Delphi OR study, Delphi)

**Supplementary Material S2**

PRISMA-Checklist

**Preferred Reporting Items for Systematic reviews and Meta-Analyses extension for Scoping Reviews (PRISMA-ScR) Checklist**

| **SECTION** | **ITEM** | **PRISMA-ScR CHECKLIST ITEM** | **REPORTED ON PAGE #** |
| --- | --- | --- | --- |
| **TITLE** | | | |
| Title | 1 | Identify the report as a scoping review. | p.1 |
| **ABSTRACT** | | | |
| Structured summary | 2 | Provide a structured summary that includes (as applicable): background, objectives, eligibility criteria, sources of evidence, charting methods, results, and conclusions that relate to the review questions and objectives. | p.1 |
| **INTRODUCTION** | | | |
| Rationale | 3 | Describe the rationale for the review in the context of what is already known. Explain why the review questions/objectives lend themselves to a scoping review approach. | p.2-4 |
| Objectives | 4 | Provide an explicit statement of the questions and objectives being addressed with reference to their key elements (e.g., population or participants, concepts, and context) or other relevant key elements used to conceptualize the review questions and/or objectives. | p.2-4 |
| **METHODS** | | | |
| Protocol and registration | 5 | Indicate whether a review protocol exists; state if and where it can be accessed (e.g., a Web address); and if available, provide registration information, including the registration number. | Not applicable |
| Eligibility criteria | 6 | Specify characteristics of the sources of evidence used as eligibility criteria (e.g., years considered, language, and publication status), and provide a rationale. | p.5 |
| Information sources* | 7 | Describe all information sources in the search (e.g., databases with dates of coverage and contact with authors to identify additional sources), as well as the date the most recent search was executed. | p.4-7 |
| Search | 8 | Present the full electronic search strategy for at least 1 database, including any limits used, such that it could be repeated. | p.5,Table 1, Supplementary material S1 |
| Selection of sources of evidence† | 9 | State the process for selecting sources of evidence (i.e., screening and eligibility) included in the scoping review. | p.4-7 |
| Data charting process‡ | 10 | Describe the methods of charting data from the included sources of evidence (e.g., calibrated forms or forms that have been tested by the team before their use, and whether data charting was done independently or in duplicate) and any processes for obtaining and confirming data from investigators. | p.5-7 |
| Data items | 11 | List and define all variables for which data were sought and any assumptions and simplifications made. | p.5-7 |
| Critical appraisal of individual sources of evidence§ | 12 | If done, provide a rationale for conducting a critical appraisal of included sources of evidence; describe the methods used and how this information was used in any data synthesis (if appropriate). | p.6-7 |
| Synthesis of results | 13 | Describe the methods of handling and summarizing the data that were charted. | p.6-7 |
| **RESULTS** | | | |
| Selection of sources of evidence | 14 | Give numbers of sources of evidence screened, assessed for eligibility, and included in the review, with reasons for exclusions at each stage, ideally using a flow diagram. | p.7, Figure 1 |
| Characteristics of sources of evidence | 15 | For each source of evidence, present characteristics for which data were charted and provide the citations. | p.8-9, Supplementary material S3-S4 |
| Critical appraisal within sources of evidence | 16 | If done, present data on critical appraisal of included sources of evidence (see item 12). | p.7-10,Supplementary S4-S6 |
| Results of individual sources of evidence | 17 | For each included source of evidence, present the relevant data that were charted that relate to the review questions and objectives. | p.7-10,Supplementary S4-S6 |
| Synthesis of results | 18 | Summarize and/or present the charting results as they relate to the review questions and objectives. | p.7-10,Supplementary S4-S6 |
| **DISCUSSION** | | | |
| Summary of evidence | 19 | Summarize the main results (including an overview of concepts, themes, and types of evidence available), link to the review questions and objectives, and consider the relevance to key groups. | p.10-15 |
| Limitations | 20 | Discuss the limitations of the scoping review process. | p.15 |
| Conclusions | 21 | Provide a general interpretation of the results with respect to the review questions and objectives, as well as potential implications and/or next steps. | p.15 |
| **FUNDING** | | | |
| Funding | 22 | Describe sources of funding for the included sources of evidence, as well as sources of funding for the scoping review. Describe the role of the funders of the scoping review. | p.15 |

*From:* Tricco AC, Lillie E, Zarin W, O'Brien KK, Colquhoun H, Levac D, et al. PRISMA Extension for Scoping Reviews (PRISMAScR): Checklist and Explanation. Ann Intern Med. 2018;169:467–473. [doi: 10.7326/M18-0850](http://annals.org/aim/fullarticle/2700389/prisma-extension-scoping-reviews-prisma-scr-checklist-explanation).

**Supplementary Material S3**

Characteristics of Eligible Records

| **ID** | **Author** | **Year of publication** | **Country of first author** | **Funding** | **Research topic** |
| --- | --- | --- | --- | --- | --- |
| 1 | Ortiz, M‌., et al. | 2014 | Germany | The German Research Foundation (Deutsche Forschungsgemeinschaft,DFG) Grant No. WI 957/16-1. | Specific disease research |
| 2 | Chen, H.Y., et al. | 2022 | China | Hong Kong Hospital Authority-funded Project:Development of Chinese Medicine Acupuncture Clinical Practice Guideline (CPG) in Low Back Pain (HA105/48 PT 19 (2013/14));National Center for Complementary and Integrative Health, National Institutes of Health (NIH NCCIH)-funded Project: “Cochrane Complementary Medicine Field: Resource for Research (R24AT001293-02) | Treatment regime |
| 3 | Cotchett, M. P., et al. | 2011 | Australia | Australian Podiatry Education and Research Foundation (APERF) | Specific disease research |
| 4 | Ge, L., et al. | 2022 | China | National Key R&D Program, China National Centre for Biotechnology Development (No.2019YFC1709805). The funding is mainly used to pay for travel expenses and expert consultation expenses in the process of preparing the guideline. | Treatment regime |
| 5 | Giese, N., et al. | 2023 | United Kingdom | No funding. | Treatment regime |
| 6 | Sun, L. Q., et al. | 2023 | China | National Key R&D Program of China (Grant No.2022YFC3500604) | Treatment regime |
| 7 | Li, X. L., et al. | 2019 | China | Capacity Building in Evidencebased Chinese Medicine and Internationalization Project(1000061020008) | Clinical survey |
| 8 | Ma, P.H., et al. | 2023 | China | National Natural Science Foundation of China (No. 82174234)/National Science Fund for Distinguished Young Scholars (No. 81825024) | Rating scale/statement/instrument |
| 9 | Nielsen, A., et al. | 2021 | USA | National Institutes of Health (NIH) through the NIH HEAL Initiative under award number UG3/UH3 AT010739 from the National Center for Complementary and Integrative Medicine. This work also received logistical and technical support from the PRISM Resource Coordinating Center under award number U24AT010961 from the NIH through the NIH HEAL Initiative | Specific disease research |
| 10 | Nielsen, A., et al. | 2022 | USA | National Center of Complementary and Integrative Health (NCCIH) of the National Institutes of Health under award number R01AT010598 | Treatment regime |
| 11 | Rotter, G., et al. | 2022 | Germany | Partly by the German Neurodermatitis Foundation (Deutsche Neurodermitis Stif-tung) and partly by funds from the investigating institute | Specific disease research |
| 12 | Smith, C. A., et al. | 2012 | Australia | No funding. | Treatment regime |
| 13 | Smith, C. A., et al. | 2011 | Australia | National Institute of Complementary Medicine (NICM) | Rating scale/statement/instrument |
| 14 | Su, X. T., et al. | 2020 | China | Distinguished Young Scholars Project of Beijing University of Chinese Medicine (Grant No.BUCM-2019-JCRC011). | Treatment regime |
| 15 | Su, X. T., et al. | 2021 | China | National Key Research and Development Program of China (Grant no. 2019YFC1712103 ). | Treatment regime |
| 16 | Li, J. L., et al. | 2021 | China | National Key Research and Development Program of China(2019YFC1712102). | Treatment regime |
| 17 | Wang, Q., et al. | 2021 | China | National Natural Science Foundation of China (Grant No. 82004213) and the Project of Sichuan Provincial Department of Science and Technology (Grant No.2021YFH0191). | Methodology research |
| 18 | Wang, X.Q., et al. | 2019 | China | National Natural Science Foundation of China(General Program, ID: 81373882) and the Fundamental Research Funds for the Central Universities (16LZUJBWTD013, 18LZUJBWZX006): Evidence-based Social Sciences Research. | Rating scale/statement/instrument |
| 19 | Yoon, S. H., et al. | 2018 | South Korea | Funding acquisition: Jun-Hwan Lee, Jungtae Leem. | Rating scale/statement/instrument |
| 20 | Zhang, N., et al. | 2021 | China | National Key R&D Program of China [grant number 2019YFC1712100]. | Treatment regime |
| 21 | Bai,Y., et al. | 2023 | China | Gansu Provincial Youth Science and Technology Fund Project(20JR10QA808) | Indicator research |
| 22 | Cui,Y. | 2022 | China | No funding. | Indicator research |
| 23 | Cui, C.L. | 2022 | China | No funding. | Other studies |
| 24 | Deng, Y.Z. | 2021 | China | Jilin Provincial Administration of Traditional Chinese Medicine Standardization Project for Chinese (Ethnic) Medicine(No.zybz-2019-013);Jilin Provincial Department of Science and Technology Medical Project (Provincial Joint Fund Norman Bethune Medical Project)(No.2021010119ZJC) | Operation standards |
| 25 | Du, S.H.,et al. | 2022 | China | Supported by the National Key R&D Program of China:2019YFC1712200； | Treatment regime |
| 26 | He, Y.H.,et al. | 2021 | China | National Key R&D Program Funded Projects(2019YFC1709805);Research project of Guangdong Provincial Bureau of Traditional Chinese Medicine(20191126); Guangdong Provincial Science and Technology Plan "Overseas Famous Teachers" Project (2020A1414010232) | Treatment regime |
| 27 | Huang, X.Q. | 2021 | China | No funding. | Treatment regime |
| 28 | Li, J.,et al. | 2014 | China | Jiangsu Provincial Government Scholarship Program for Studying Abroad;Jiangsu Provincial Department of Education General Project(11KJB360001);Funding project for the construction of advantageous disciplines in Jiangsu universities | Operation standards |
| 29 | Li, X.Y. | 2020 | China | No funding. | Indicator research |
| 30 | Liu, T. | 2022 | China | National Key R&D Program Funded Projects(2019YFC1712200) | Operation standards |
| 31 | Liu, L.P.,et al. | 2022 | China | National Key R&D Program Funded Projects(2019YFC1712200;2019YFC1712203) | Treatment regime |
| 32 | Ran, N. | 2021 | China | No funding. | Operation standards |
| 33 | Shi, L.J. | 2023 | China | No funding. | Rating scale/statement/instrument |
| 34 | Yang,C.,et al. | 2022 | China | National Key R&D Program Funded Projects(2019YFC1712200) | Treatment regime |
| 35 | Yang, J.M. | 2014 | China | No funding. | Rating scale/statement/instrument |
| 36 | Yue, L.H. | 2023 | China | No funding. | Rating scale/statement/instrument |
| 37 | Zhang, H.N. | 2023 | China | No funding. | Treatment regime |

**Supplementary Material S4**

Details of Delphi Consensus in Eligible Records

| **ID** | **Author** | **Rounds in Delphi** | **Working panel** | | **Preliminary investigation** | | **Number of experts in Delphi survey** | **Questionnaire form in Delphi process** | **Response rate** | **Expert information** |
| --- | --- | --- | --- | --- | --- | --- | --- | --- | --- | --- |
| **Report** | **Composition of working panel** | **Report** | **Method** |
| 1 | Ortiz, M‌., et al. | 3 | - | - | - | - | <10 | - | - | Yes |
| 2 | Chen, H.Y., et al. | - | yes | Steering panel, working panel | yes | To investigate their applicability to local registered acupuncturists | 10-30 | - | - | Yes |
| 3 | Cotchett, M. P., et al. | 3 | - | - | - | - | 10-30 | - | - | - |
| 4 | Ge, L., et al. | 3 | yes | Four subgroups: steering committee,expert consensus group, evidence review group,academic secretariat group | yes | To conduct an online face-to-face discussion through Microsoft Team meeting to identify five clinical questions, then two rounds of Delphi survey to form the questionnaire | 10-30 | - | 14/15 | Yes |
| 5 | Giese, N., et al. | 3 | - | - | yes | To conduct a systematized literature review | 10-30 | Email | 100% | Yes |
| 6 | Sun, L. Q., et al. | 2 | yes | Steering group, expert group | yes | To establish a steering group and discussion to form the preliminary questions and conduct an electronic literature search and expert consultation | 10-30 | Online software | 100% | Yes |
| 7 | Li, X. L., et al. | - | - | - | - | - | <10 | - | - | Yes |
| 8 | Ma, P.H., et al. | 2 | yes | Working group, expert advisory group | yes | To conduct a 2-Delphi round survey involving over 100 multidisciplinary participants from 10 countries and then finalize the checklist draft | >100 | - | - | Yes |
| 9 | Nielsen, A., et al. | 3 | yes | Acupuncture Advisory Panel | yes | To email AAP members and ask them how they treated cLBP in general and with older adult | <10 | Email/telephone | - | Yes |
| 10 | Nielsen, A., et al. | 3 | yes | Acupuncture Advisory Panel | yes | To send a literature review to the AAp by email | <10 | Online and email | - | Yes |
| 11 | Rotter, G., et al. | - | - | - | - | - | - | - | - | Yes |
| 12 | Smith, C. A., et al. | 3 | - | - | - | - | 10-30 | Online | 17/28,16/28,15/28 | Yes |
| 13 | Smith, C. A., et al. | 2 | yes | NICMAN (National Institute for Complementary Medicine Acupuncture Network) group | yes | To ask all NICMAN members identify and define what criteria were deemed necessary for determining quality acupuncture within the confines of an acupuncture clinical trial | 30-50 | Email | 76% | Yes |
| 14 | Su, X. T., et al. | 2 | yes | Steering group, expert group | yes | To conduct a clinical question investigation among 47 acupuncturists | 10-30 | Email/wechat | 100% | Yes |
| 15 | Su, X. T., et al. | 2 | yes | Steering group, expert group | yes | To conduct a 2-round investigation involving 74 traditional Chinese medicine (TCM) acupuncturists | 10-30 | Online software | 100% | Yes |
| 16 | Li, J. L., et al. | 3 | yes | Assistance team | yes | To conduct a two-round semi-open clinical issue investigation involving a multidisciplinary panel of specialists | 10-30 | Online software | 100%, 96.67%, 100% | Yes |
| 17 | Wang, Q., et al. | 3 | yes | Four groups: a guideline steering committee, a guideline formulation group, a guideline secretary group, and an external review group | yes | To investigate the essential clinical problems and outcomes | - | Questionnaire star(a survey tool) | - | - |
| 18 | Wang, X.Q., et al. | 3 | yes | Working group | yes | To conduct a multicenter questionnaire survey in five cities (Beijing,Shanghai,Nanjing, Chengdu, and Lanzhou) located in different parts of China | 10-30 | Email | 100% | Yes |
| 19 | Yoon, S. H., et al. | 4 | - | - | yes | To conduct a pilot observational study | 10-30 | Email | - | - |
| 20 | Zhang, N., et al. | 3 | yes | Assistance team | yes | To conduct 2 rounds of semiopen clinical issue investigation involving 80 clinical specialists | 10-30 | Email/WeChat/online software(www.wjx.cn) | 100%, 96.67% | Yes |
| 21 | Bai,Y., et al. | 2 | yes | Steer group, Delphi questionnaire survey group, expert group | yes | To conduct a literature review, semi-structured interview in patients, and form a Delphi questionnaire based on original outcome indicators | >100 | Online software(www.wjx.cn) | 94.3%, 95.4% | - |
| 22 | Cui,Y. | 2 | - | - | yes | To conduct a semi-structured interview | 30-50 | Online software(www.wjx.cn) | 51/58,42/51 | Yes |
| 23 | Cui, C.L. | 2 | yes | Acupuncture Standardization System Research Working Group | yes | To conduct a semi-structured interview | 30-50 | Email/wechat/online meeting | 100% | Yes |
| 24 | Deng, Y.Z. | 2 | - | - | - | - | 10-30 | Email | 100% | Yes |
| 25 | Du, S.H.,et al. | 3 | yes | Drafting group,steering group,GDG group | yes | To conduct an analysis of responses and suggestions from the guideline steering group | 10-30 | Online | - | Yes |
| 26 | He, Y.H.,et al. | 2 | - | - | Yes | To conduct a literature research | 10-30 | Email | 83.3%,84% | Yes |
| 27 | Huang, X.Q. | 3 | yes | Development group | - | - | 10-30 | Online software(Tencent questionnaire) | 100%，100% | Yes |
| 28 | Li, J.,et al. | 3 | - | - | - | - | <10 | - | - | Yes |
| 29 | Li, X.Y. | 3 | yes | Steer group, Delphi questionnaire survey group, expert group | yes | To conduct a semi-structured interview | 10-30 | E-questionnaire | 85%, 91.7% | Yes |
| 30 | Liu, T. | 4 | yes | Drafting group,expert group | yes | To conduct a literature research and investigation | 10-30 | - | 100% | Yes |
| 31 | Liu, L.P.,et al. | 3 | yes | Working group, guideline development group | yes | To conduct a semi-structured interview | 10-30 | Email/wechat/online software(www.wjx.com) | 91.7%,100%,100% | Yes |
| 32 | Ran, N. | 2 | yes | Working group | - | - | 10-30 | Email | 100%, 94.1% | Yes |
| 33 | Shi, L.J. | 2 | - | - | yes | To conduct a systematized literature review and expert investigation | 10-30 | Online software(www.wjx.cn) | 85.19%(10% effectively),100% | Yes |
| 34 | Yang,C.,et al. | 3 | yes | Guideline drafting group,GDG group | yes | To conduct a preliminary questionnaire survey and semi-structured interview | 10-30 | Jinshuju online list | 16/17,16/17 | Yes |
| 35 | Yang, J.M. | 2 | yes | Working group | yes | To conduct an interview to patients, family members and medical staff | 10-30 | Online | 100% | Yes |
| 36 | Yue, L.H. | 2 | yes | Drafting group,expert group | yes | To conduct a pre-inquiry | >50 | E-questionnaire | 63/64 | Yes |
| 37 | Zhang, H.N. | 2 | yes | Delphi research group | yes | To conduct a pre-inquiry | 30-50 | Online software(www.wjx.cn) | 100% | Yes |

**Supplementary Material S5**

Reporting Items of Delphi Consensus in Eligible Records Based on CREDES Standards

| **Author** | **Rationale for the choice of the Delphi technique** | **Planning and design** | | **Study conduct** | | | | **Reporting** | | | | | | | | |
| --- | --- | --- | --- | --- | --- | --- | --- | --- | --- | --- | --- | --- | --- | --- | --- | --- |
| Justification | Planning and process | Definition of consensus | Info. input | Prevention of bias | Interpretation and processing of results | External validation | Purpose and rationale | Expert panel | Description of the methods | Procedure | Definition and attainment of consensus | Results | Discussion of limitations | Adequacy of conclusions | Publication and dissemination |
| Ortiz, M‌., et al. | - | Yes | - | - | - | Yes | - | Yes | Yes | - | - | - | Yes | - | - | - |
| Chen, H.Y., et al. | - | Yes | - | Yes | - | Yes | - | Yes | Yes | Yes | Yes | - | Yes | Yes | Yes | - |
| Cotchett, M. P., et al. | - | - | - | - | - | Yes | - | Yes | Yes | - | Yes | - | Yes | - | - | Yes |
| Ge, L., et al. | - | Yes | Yes | Yes | Yes | Yes | Yes | Yes | Yes | Yes | Yes | Yes | Yes | Yes | Yes | Yes |
| Giese, N., et al. | Yes | Yes | Yes | Yes | Yes | Yes | - | Yes | Yes | Yes | Yes | Yes | Yes | Yes | Yes | Yes |
| Sun, L. Q., et al. | Yes | Yes | Yes | Yes | Yes | Yes | Yes | Yes | Yes | Yes | Yes | Yes | Yes | Yes | Yes | Yes |
| Li, X. L., et al. | - | - | - | - | Yes | - | - | - | Yes | Yes | - | - | Yes | - | - | - |
| Ma, P.H., et al. | - | Yes | - | Yes | - | Yes | Yes | Yes | Yes | Yes | Yes | - | Yes | Yes | - | Yes |
| Nielsen, A., et al. | Yes | Yes | Yes | Yes | - | Yes | Yes | Yes | Yes | Yes | Yes | - | Yes | - | Yes | Yes |
| Nielsen, A., et al. | Yes | Yes | - | Yes | - | - | - | Yes | Yes | Yes | Yes | - | - | - | - | Yes |
| Rotter, G., et al. | - | - | - | - | - | - | - | - | - | - | - | - | - | - | - | - |
| Smith, C. A., et al. | Yes | Yes | Yes | - | - | Yes | - | Yes | Yes | Yes | Yes | Yes | Yes | Yes | - | - |
| Smith, C. A., et al. | Yes | Yes | Yes | Yes | Yes | Yes | - | Yes | Yes | Yes | Yes | Yes | Yes | Yes | Yes | Yes |
| Su, X. T., et al. | Yes | Yes | Yes | Yes | Yes | Yes | - | Yes | Yes | Yes | Yes | Yes | Yes | Yes | Yes | Yes |
| Su, X. T., et al. | Yes | Yes | Yes | Yes | Yes | Yes | - | Yes | Yes | Yes | Yes | Yes | Yes | Yes | Yes | Yes |
| Li, J. L., et al. | Yes | Yes | Yes | Yes | - | Yes | Yes | Yes | Yes | Yes | Yes | Yes | Yes | Yes | Yes | Yes |
| Wang, Q., et al. | Yes | Yes | - | Yes | - | - | Yes | Yes | - | Yes | Yes | - | - | Yes | - | Yes |
| Wang, X.Q., et al. | Yes | Yes | Yes | Yes | Yes | Yes | Yes | Yes | Yes | Yes | Yes | Yes | Yes | - | Yes | Yes |
| Yoon, S. H., et al. | Yes | Yes | Yes | Yes | Yes | - | - | Yes | Yes | Yes | Yes | Yes | - | - | - | Yes |
| Zhang, N., et al. | Yes | Yes | Yes | Yes | - | Yes | Yes | Yes | Yes | Yes | Yes | Yes | Yes | Yes | Yes | Yes |
| Bai,Y., et al. | - | Yes | Yes | Yes | - | - | - | Yes | Yes | Yes | Yes | Yes | Yes | Yes | Yes | Yes |
| Cui,Y. | - | Yes | Yes | - | - | - | - | - | - | Yes | Yes | - | Yes | - | - | Yes |
| Cui, C.L. | Yes | Yes | Yes | Yes | - | Yes | - | Yes | Yes | Yes | Yes | Yes | Yes | Yes | Yes | Yes |
| Deng, Y.Z. | Yes | Yes | Yes | - | - | - | - | Yes | Yes | Yes | Yes | Yes | Yes | - | - | Yes |
| Du, S.H.,et al. | Yes | Yes | Yes | Yes | Yes | Yes | - | Yes | Yes | Yes | Yes | Yes | Yes | Yes | Yes | Yes |
| He, Y.H.,et al. | - | Yes | - | Yes | - | - | - | Yes | Yes | Yes | Yes | - | Yes | - | Yes | Yes |
| Huang, X.Q. | Yes | Yes | Yes | - | - | Yes | - | Yes | Yes | Yes | Yes | Yes | Yes | - | Yes | Yes |
| Li, J.,et al. | - | - | - | - | - | - | - | Yes | Yes | Yes | Yes | - | Yes | Yes | - | Yes |
| Li, X.Y. | Yes | Yes | Yes | Yes | Yes | Yes | - | Yes | Yes | Yes | Yes | - | Yes | Yes | - | Yes |
| Liu, T. | Yes | Yes | Yes | Yes | Yes | Yes | Yes | Yes | Yes | Yes | Yes | Yes | Yes | Yes | Yes | Yes |
| Liu, L.P.,et al. | Yes | Yes | Yes | Yes | Yes | Yes | - | Yes | Yes | Yes | Yes | Yes | Yes | Yes | Yes | Yes |
| Ran, N. | Yes | Yes | Yes | Yes | - | Yes | Yes | Yes | Yes | Yes | Yes | Yes | Yes | Yes | Yes | Yes |
| Shi, L.J. | Yes | Yes | Yes | Yes | Yes | Yes | - | Yes | Yes | Yes | Yes | Yes | Yes | Yes | - | Yes |
| Yang,C.,et al. | Yes | Yes | Yes | Yes | Yes | Yes | - | Yes | Yes | Yes | Yes | Yes | Yes | Yes | Yes | Yes |
| Yang, J.M. | Yes | Yes | Yes | Yes | Yes | Yes | - | Yes | Yes | Yes | Yes | Yes | Yes | Yes | Yes | Yes |
| Yue, L.H. | Yes | Yes | Yes | Yes | Yes | Yes | Yes | Yes | Yes | Yes | Yes | Yes | Yes | Yes | Yes | Yes |
| Zhang, H.N. | Yes | Yes | Yes | Yes | Yes | Yes | Yes | Yes | Yes | Yes | Yes | Yes | Yes | Yes | Yes | Yes |
| **Reporting rate (%)** | **70.27%** | **89.19%** | **72.97%** | **75.68%** | **48.65%** | **72.97%** | **32.43%** | **91.89%** | **91.89%** | **91.89%** | **91.89%** | **64.86%** | **89.19%** | **67.57%** | **62.16%** | **86.49%** |

**Supplementary Material S6**

Reporting Quality of Delphi Consensus in Eligible Records Based on CREDES Standards

| **Author** | **Rationale for the choice of the Delphi technique(%)** | **Planning and design(%)** | **Study conduct(%)** | **Reporting(%)** | **Average(%)** | **ICC** | **95%CI** | **p-value** |
| --- | --- | --- | --- | --- | --- | --- | --- | --- |
| Ortiz, M‌., et al. | 0.00 | 18.75 | 6.25 | 12.50 | 9.38 | 0.59 | 0.151 to 0.833 | 0.00628 |
| Chen, H.Y., et al. | 12.50 | 37.50 | 43.75 | 54.17 | 36.98 | 0.86 | 0.651 to 0.95 | 5.88E-06 |
| Cotchett, M. P., et al. | 0.00 | 0.00 | 6.25 | 25.00 | 7.81 | 0.90 | 0.75 to 0.965 | 1.81E-07 |
| Ge, L., et al. | 12.50 | 75.00 | 96.88 | 81.94 | 66.58 | 0.75 | 0.422 to 0.902 | 0.00021 |
| Giese, N., et al.* | 100.00 | 81.25 | 65.63 | 94.44 | 85.33 | 0.82 | 0.569 to 0.934 | 1.95E-05 |
| Sun, L. Q., et al.* | 87.50 | 81.25 | 71.88 | 95.83 | 84.11 | 0.59 | 0.157 to 0.835 | 0.00593 |
| Li, X. L., et al. | 0.00 | 6.25 | 21.88 | 18.06 | 11.55 | 0.71 | 0.345 to 0.89 | 0.000812 |
| Ma, P., et al. | 12.50 | 37.50 | 71.88 | 65.28 | 46.79 | 0.91 | 0.742 to 0.969 | 1.30E-06 |
| Nielsen, A., et al. | 62.50 | 75.00 | 68.75 | 52.78 | 64.76 | 0.82 | 0.553 to 0.931 | 2.13E-05 |
| Nielsen, A., et al. | 100.00 | 50.00 | 15.63 | 27.78 | 48.35 | 0.89 | 0.725 to 0.962 | 7.81E-07 |
| Rotter, G., et al. | 25.00 | 6.25 | 3.13 | 5.56 | 9.98 | 0.68 | 0.285 to 0.877 | 0.00173 |
| Smith, C. A., et al. | 100.00 | 81.25 | 21.88 | 79.17 | 70.57 | 0.94 | 0.838 to 0.978 | 5.16E-09 |
| Smith, C. A., et al.* | 100.00 | 87.50 | 59.38 | 91.67 | 84.64 | 0.89 | 0.71 to 0.958 | 5.43E-07 |
| Su, X. T., et al.* | 100.00 | 87.50 | 59.38 | 87.50 | 83.59 | 0.90 | 0.738 to 0.964 | 6.26E-07 |
| Su, X. T., et al.* | 87.50 | 87.50 | 68.75 | 95.83 | 84.90 | 0.88 | 0.703 to 0.957 | 7.15E-07 |
| Li, J. L., et al. | 62.50 | 81.25 | 68.75 | 87.50 | 75.00 | 0.85 | 0.623 to 0.945 | 9.04E-06 |
| Wang, Q., et al. | 37.50 | 18.75 | 50.00 | 36.11 | 35.59 | 0.85 | 0.63 to 0.947 | 9.30E-06 |
| Wang, X.Q., et al.* | 87.50 | 87.50 | 87.50 | 79.17 | 85.42 | 0.77 | 0.448 to 0.913 | 0.000219 |
| Yoon, S. H., et al. | 87.50 | 81.25 | 43.75 | 50.00 | 65.63 | 0.92 | 0.792 to 0.971 | 4.70E-08 |
| Zhang, N., et al. | 87.50 | 75.00 | 37.50 | 90.28 | 72.57 | 0.84 | 0.607 to 0.943 | 9.13E-06 |
| Bai,Y., et al. | 0.00 | 87.50 | 15.63 | 61.11 | 41.06 | 0.92 | 0.791 to 0.971 | 3.85E-08 |
| Cui,Y. | 0.00 | 50.00 | 3.13 | 37.50 | 22.66 | 0.88 | 0.698 to 0.956 | 9.95E-07 |
| Cui, C.L. | 100.00 | 93.75 | 43.75 | 76.39 | 78.47 | 0.94 | 0.843 to 0.979 | 3.58E-09 |
| Deng, Y.Z. | 100.00 | 100.00 | 6.25 | 55.56 | 65.45 | 0.96 | 0.895 to 0.986 | 1.41E-10 |
| Du, S.H.,et al.* | 100.00 | 100.00 | 37.50 | 90.28 | 81.94 | 0.85 | 0.603 to 0.947 | 1.94E-05 |
| He, Y.H.,et al. | 0.00 | 12.50 | 9.38 | 33.33 | 13.80 | 0.86 | 0.655 to 0.95 | 3.93E-06 |
| Huang, X.Q. | 100.00 | 100.00 | 15.63 | 65.28 | 70.23 | 0.93 | 0.826 to 0.976 | 1.11E-08 |
| Li, J.,et al. | 0.00 | 12.50 | 0.00 | 27.78 | 10.07 | 0.82 | 0.566 to 0.932 | 1.78E-05 |
| Li, X.Y. | 100.00 | 87.50 | 43.75 | 79.17 | 77.60 | 0.91 | 0.767 to 0.967 | 8.72E-08 |
| Liu, T.* | 100.00 | 87.50 | 96.88 | 84.72 | 92.27 | 0.59 | 0.151 to 0.833 | 0.00628 |
| Liu, L.P.,et al.* | 100.00 | 93.75 | 46.88 | 86.11 | 81.68 | 0.90 | 0.748 to 0.966 | 4.74E-07 |
| Ran, N. | 75.00 | 81.25 | 71.88 | 90.28 | 79.60 | 0.87 | 0.667 to 0.951 | 1.72E-06 |
| Shi, L.J. | 100.00 | 93.75 | 53.13 | 70.83 | 79.43 | 0.92 | 0.786 to 0.971 | 1.01E-07 |
| Yang,C.,et al.* | 100.00 | 93.75 | 50.00 | 87.50 | 82.81 | 0.90 | 0.739 to 0.963 | 2.42E-07 |
| Yang, J.M.* | 100.00 | 93.75 | 53.13 | 87.50 | 83.59 | 0.89 | 0.706 to 0.959 | 1.22E-06 |
| Yue, L.H.* | 100.00 | 100.00 | 90.63 | 94.44 | 96.27 | 0.47 | -0.025 to 0.778 | 0.0305 |
| Zhang, H.N.* | 87.50 | 100.00 | 62.50 | 86.11 | 84.03 | 0.83 | 0.588 to 0.939 | 1.85E-05 |
| **Total (%)** | **65.54** | **68.75** | **45.10** | **66.07** | **61.36** | - | - | - |
| Note: *Average ≥80%. | | | | | | | | |
